# Supplementary material for: Histoplasmosis at a Reference Center for Infectious Diseases in Southeast Brazil: Comparison between HIV Positive and HIV Negative Individuals
Source: Preprints.org preprint supplement (doi:10.20944/preprints202304.0998.v1), 2023-04-26
Supplement: Supplementary file 1 [file supplementary]

**Table S1**- Clinical specimens collected for culture in patients diagnosed with histoplasmosis, INI 2000-2018.

|  | **Variables** |  | **Diagnosis of HIV** | |  |
| --- | --- | --- | --- | --- | --- |
|  |  |  | **Negative** | **Positive** | **P-value** |
| **Culture** | **Lymphnode biopsy** | No | 34 (100) | 58 (89.2) | 0.092 |
| Yes | 0 (0) | 7 (10.8) |  |
| **Blood** | No | 30 (88.2) | 44 (67.7) | 0.025 |
| Yes | 4 (11.8) | 21 (32.3) |  |
| **Bone Marrow** | No | 31 (91.2) | 41 (63.1) | 0.003 |
| Yes | 3 (8.8) | 24 (36.9) |  |
| **Skin Biopsy** | No | 31 (91.2) | 61 (93.8) | 0.689 |
| Yes | 3 (8.8) | 4 (6.2) |  |
| **Bronchoalveolar Lavage** | No | 29 (85.3) | 61 (93.8) | 0.268 |
| Yes | 5 (14.7) | 4 (6.2) |  |
| **Sputum** | No | 31 (91.2) | 60 (92.3) | 1 |
| Yes | 3 (8.8) | 5 (7.7) |  |
| **Urine** | No | 34 (100) | 64 (98.5) | 1 |
| Yes | 0 (0) | 1 (1.5) |  |
| **Negative culture** | No | 27 (79.4) | 54 (83.1) | 0.653 |
| Yes | 7 (20.6) | 11 (16.9) |  |
|  | **Total** |  | **34** | **65** |  |

**Table S2** - Temporal comparison between obtaining the result of the culture and the date of hospitalization until death, INI 2000-2018.

| **Variables** |  | **Diagnosis of HIV** | |  |
| --- | --- | --- | --- | --- |
|  |  | **Negative** | **Positive** | **P-value** |
| **Time to receive culture result (in days)** | Median (IQR) | 12.5 (7-19.5) | 13.5 (8.8-27) | 0.292 |
| **Hospitalization time resulting in death** | Mean (SD) | 12 (10,14) | 6 (5,18.5) | < 0.001 |

IQR = Interquartile Range; SD = Standard Deviation
